# Supplementary material
Source: Springer Nature journal article supplement (https://www.springermedizin.de/resource/supplementary/12881_2010_830_MOESM3_ESM.pdf/9451512)

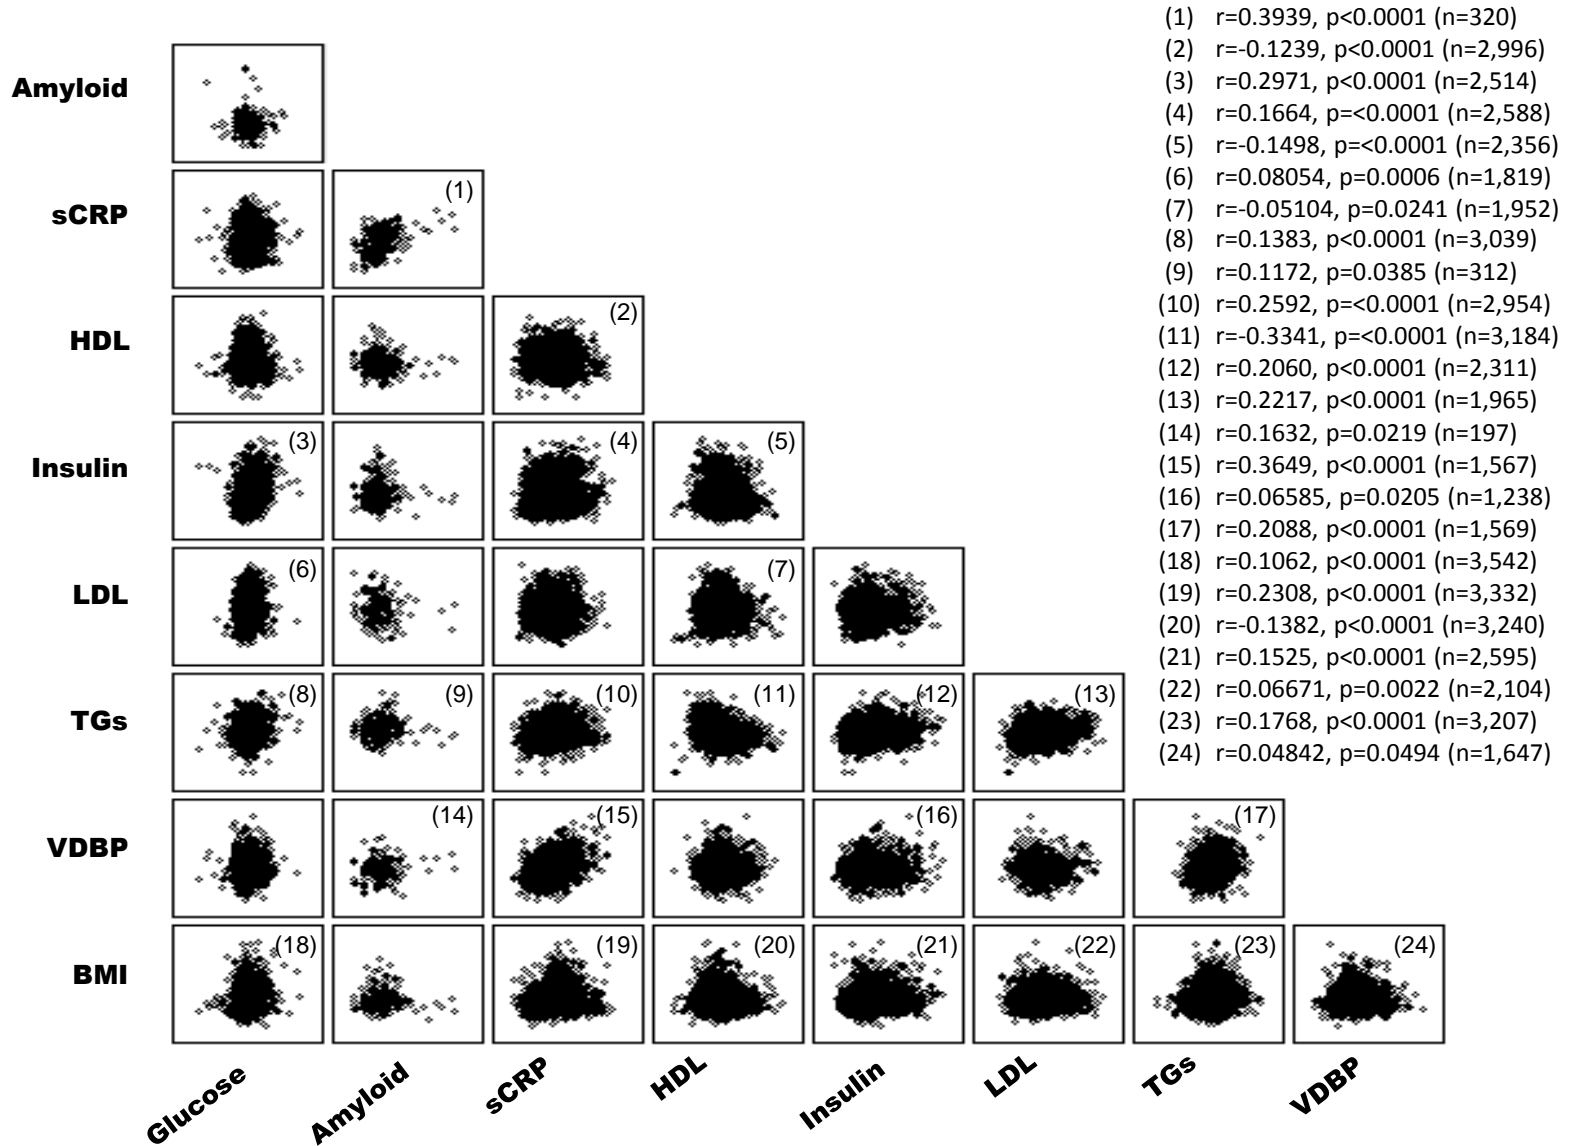

Supplement: MOESM3 [file 9451512]
